# Supplementary material for: Dynamic localization of C. elegans TPR-GoLoco proteins mediates mitotic spindle orientation by extrinsic signaling
Source: Oxford University Press journal article supplement (doi:10.1242/dev.070979), 2011-09-09
Supplement: dev070979tables1.pdf [file dev070979tables1.pdf]

Table S1. Strains used

| Strain | Genotype                                                                                                   | Name given in article                 | Source                                            |
|--------|------------------------------------------------------------------------------------------------------------|---------------------------------------|---------------------------------------------------|
| N2     | Wild type                                                                                                  | Wild type                             | <i>Caenorhabditis</i> Genetics Center             |
| TH242  | <i>unc-119(ed3) III</i> ; <i>ddIs32[yfp::gpr-1(synthetic, CAI 1.0, artificial introns); unc-119(+)]</i>    | YFP::GPR-1                            | A gift from H. Bringmann, (Redemann et al., 2010) |
| TH384* | <i>unc-119(ed3) III</i> ; <i>ddIs79[mCherry::gpr-1(synthetic, CAI 1.0, artificial introns) unc-119(+)]</i> | mCherry::GPR-1                        | A gift from H. Bringmann                          |
| SS149  | <i>mes-1(bn7)</i>                                                                                          |                                       | Capowski et al., 1991                             |
| LP42   | TH384; <i>mes-1(bn7)</i>                                                                                   | <i>mes-1(bn7)</i> ;<br>mCherry::GPR-1 | This paper                                        |
| LP43   | TH384; <i>mom-2(or309)/nT1</i>                                                                             |                                       | This paper                                        |
| LP44   | TH384; <i>gpa-16(it143)</i>                                                                                |                                       | This paper                                        |
| LP45   | TH384; TH65                                                                                                | mCherry::GPR-1;<br>YFP::alpha tubulin | This paper                                        |
| LP46   | TH384; <i>spd-2(or188)</i>                                                                                 | mCherry::GPR-1; <i>spd-2(or188)</i>   | This paper                                        |
| TH73   | <i>yfp::let-99</i>                                                                                         | YFP::LET-99                           | Bringmann et al., 2007                            |
| TH65   | <i>yfp::α-tubulin</i>                                                                                      | YFP::α-tubulin                        | Kozłowski et al., 2007                            |
|        | <i>gfp::gpr-2</i>                                                                                          | GFP::GPR-2                            | Colombo et al., 2003                              |

\*This strain was received as an extrachromosomal array and was integrated in our laboratory.

#### Additional references

- Bringmann, H., Cowan, C. R., Kong, J. and Hyman, A. A. (2007). LET-99, GOA-1/GPA-16, and GPR-1/2 are required for aster-positioned cytokinesis. *Curr. Biol.* **17**, 185-191.
- Capowski, E. E., Martin, P., Garvin, C. and Strome, S. (1991). Identification of grandchildless loci whose products are required for normal germline development in the nematode *Caenorhabditis elegans*. *Genetics* **129**, 1061-1072.
- Kozłowski, C., Srayko, M. and Nedelec, F. (2007). Cortical microtubule contacts position the spindle in *C. elegans* embryos. *Cell* **129**, 499-510.
